# Supplementary material for: Rapid and manual-shaking exfoliation of amidoximated cellulose nanofibrils for a large-capacity filtration capture of uranium
Source: Royal Society of Chemistry journal article supplement (doi:10.1039/d1ta10357a), 2022-01-01
Supplement: d1ta10357a1.pdf [file d1ta10357a1.pdf]

1 **Supporting Information**

2 **Rapid and manual-shaking exfoliation of amidoximated cellulose nanofibrils for large-**  
3 **capacity filtration capture of uranium**

4 *Weihua Zhang<sup>a,b</sup>, Xiao Han<sup>b,c</sup>, Jun You<sup>d</sup>, Xiaofang Zhang<sup>b,c</sup>, Danfeng Pei<sup>b,c</sup>, Stefan Willför,<sup>a</sup>*  
5 *Mingjie Li<sup>\*b,c</sup>, Chunlin Xu<sup>\*</sup>, and Chaoxu Li<sup>\*b,c</sup>*

6 <sup>a</sup> Laboratory of Natural Materials Technology, Åbo Akademi University, Henrikinkatu 2,  
7 Turku FI-20500, Finland

8 <sup>b</sup>Group of Biomimetic Smart Materials, Qingdao Institute of Bioenergy and Bioprocess  
9 Technology, Chinese Academy of Sciences & Shandong Energy Institute, Songling Road 189,  
10 Qingdao 266101, P.R. China

11 <sup>c</sup>Center of Material and Optoelectronics Engineering, University of Chinese Academy of  
12 Sciences, 19A Yuquan Road, Beijing 100049, P. R. China

13 <sup>d</sup>Key Laboratory for the Green Preparation and Application of Functional Materials, Hubei  
14 Key laboratory of Polymer Materials, School of Materials Science and Engineering, Hubei  
15 University, Youyi Road 368, Wuhan 430062, China

16 \*Corresponding authors: Chaoxu Li (Email: licx@qibebt.ac.cn); Chunlin Xu (Email:  
17 chunlin.xu@abo.fi); Mingjie Li (Email: limj@qibebt.ac.cn).

18

19 **Table of contents in Supporting Information:**

20 **Supporting experimental section**

21 **Supporting figures**

22 *Figure S1-Figure S16*

23 **Supporting tables**

24 *Table S1-Table S4*

25 **Supporting references**

26 *Reference S1-Reference S23*

27

28 **Supporting experimental section**

29 *Adsorption in non-spiked natural seawater.* The uranium uptake capacity was also  
30 determined in natural seawater without the addition of additional uranium. The adsorbents (5  
31 mg) were soaked into natural seawater (50 L, collected from Yellow Sea of China, Qingdao,  
32 Shandong Province) for 7, 14, 21, and 30 days, followed by digesting under microwave  
33 digestion for 1 h, filtrating and diluting with deionized water, respectively. The uranium  
34 concentration was determined by ICP-MS.

35

36 **Supporting figures**

37

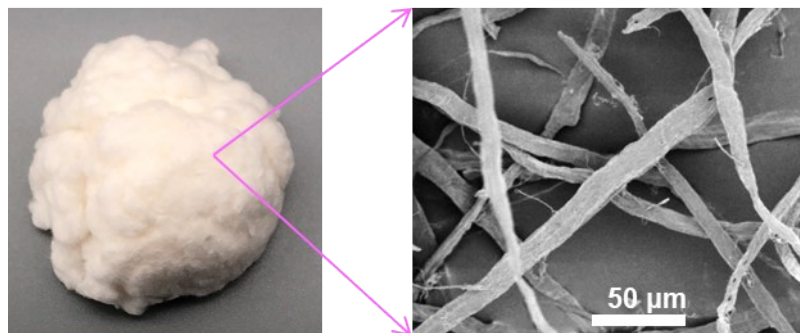

38

39

**Fig. S1.** Commercial softwood pulp.

40

41

42

43

44

45

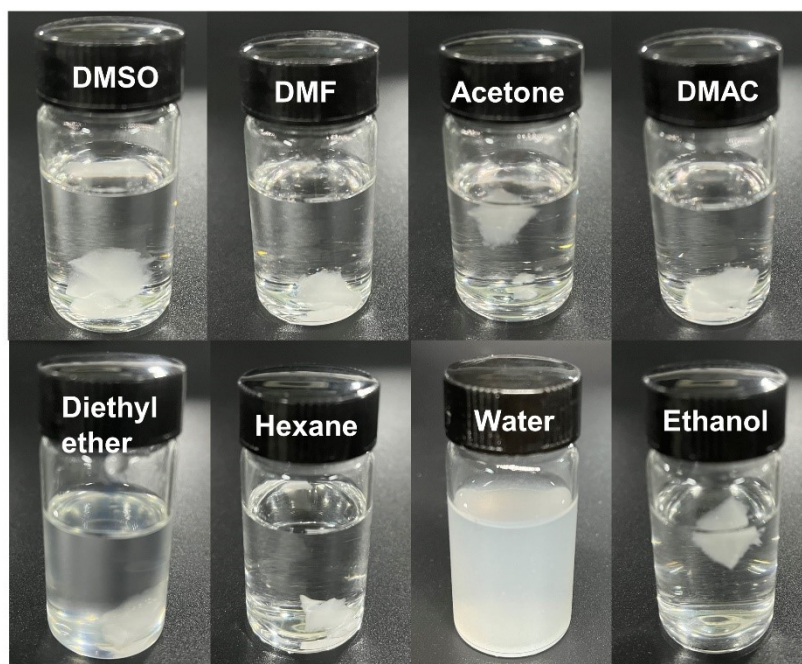

46

47 **Fig. S2.** Photographs of freeze-dried mechanically grinded cellulose nanofibers in various

48 solvents.

49

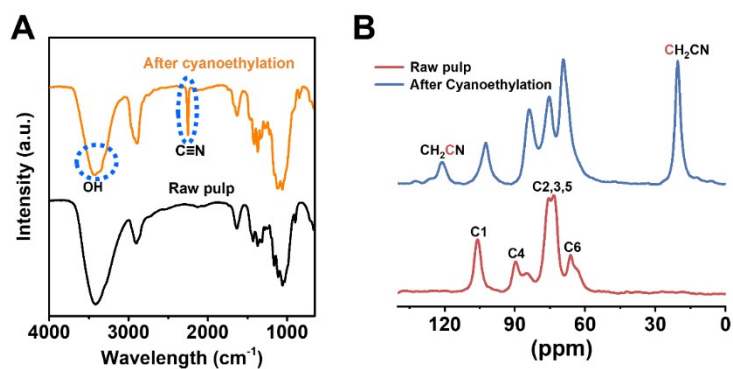

50

51 **Fig. S3.** FT-IR spectra (A) and solid-state <sup>13</sup>C NMR spectra (B) of cellulose pulp before and  
 52 after cyanoethylation.

53

54

55

56

57

58

59

60

61

62

63

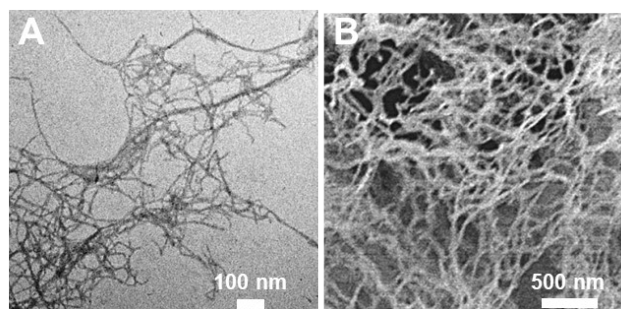

64

65 **Fig. S4.** TEM (A) and SEM (B) images of cyanoethylated cellulose nanofibrils.  
 66 Cyanoethylated *DS*: ~1.58.

67

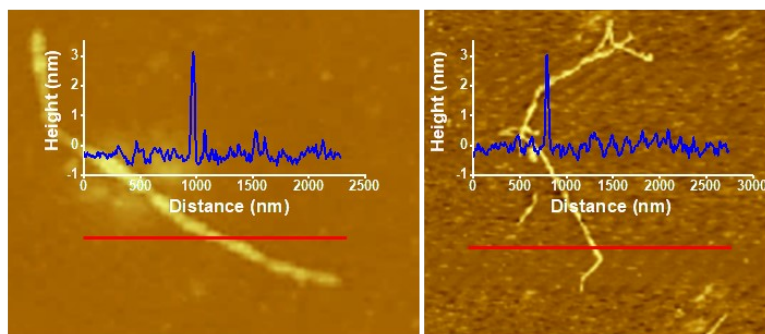

68

69 **Fig. S5.** AFM images of cyanoethylated cellulose nanofibrils. Cyanoethylated *DS*:  $\sim 1.58$ .

70

71

72

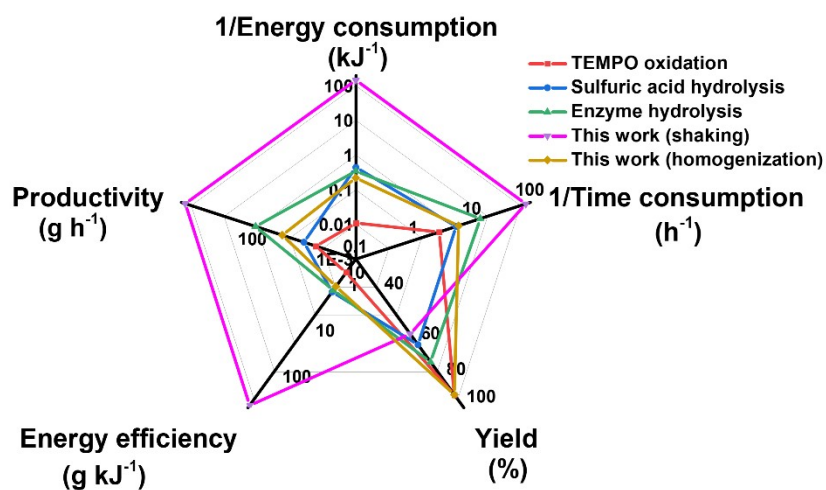

73

74 **Fig. S6.** Production characteristics of cyanoethylated cellulose fibrils in comparison to other  
 75 production methods of cellulose fibrils.

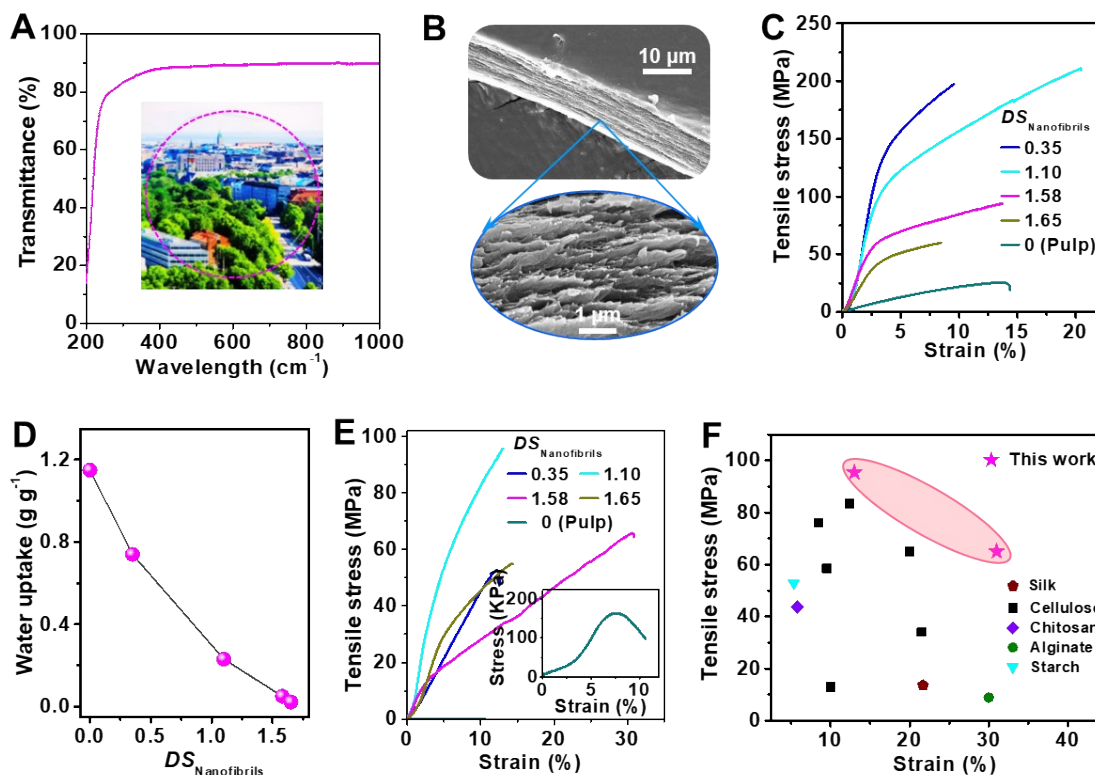

76

77 **Fig. S7. Physical characterization of film of cyanoethylated cellulose fibrils.** (A)  
 78 Transparency evaluated by UV-vis transmittance. (B) Cross-sectional SEM images. (C)  
 79 Stress-strain curves with indicated cyanoethylated *DS* values. (D) Influence of  
 80 cyanoethylated *DS* values on water uptake. (E) Stress-strain curves at wet states with  
 81 indicated cyanoethylated *DS* values. (F) mechanical performances at wet states in comparison  
 82 to other biopolymers.

83

84

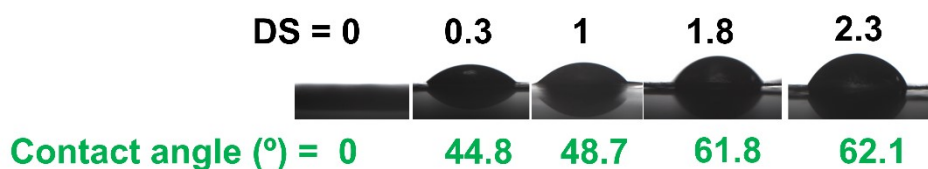

85

86 **Fig. S8.** Water contact angle measured on the cyanoethylated cellulose fibrils films with  
 87 different *DS* values.

88

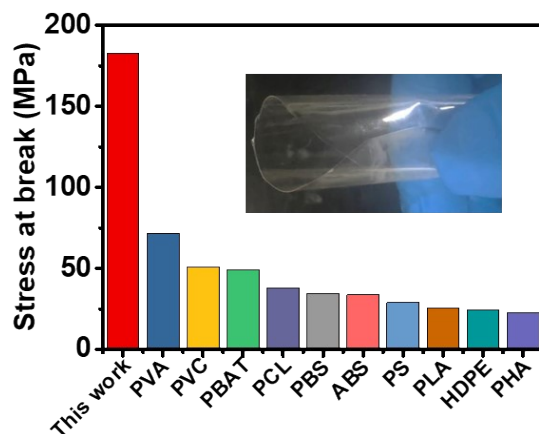

89

90 **Fig. S9.** Tensile stress at break of film of cyanoethylated cellulose fibrils in comparison to  
 91 other synthetic polymers <sup>1</sup>. Polyvinyl alcohol: PVA; Poly vinyl chloride: PVC; Poly(butylene  
 92 adipate-co-terephthalate): PBAT; Polycaprolactone: PCL; Polybutylene succinate: PBS;  
 93 Acrylonitrile butadiene styrene: ABS; Polystyrene: PS; Polylactic acids: PLA; High-density  
 94 polyethylene: HDPE; Polyhydroxyalkanoates: PHAs.

95

96

97

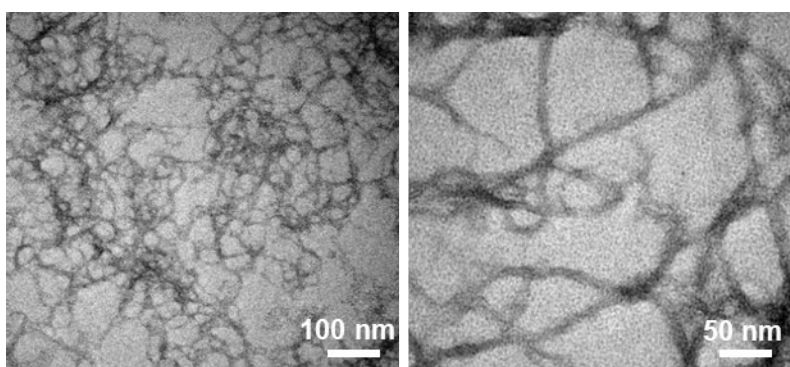

98

99

100 **Fig. S10.** TEM images of amidoximated cellulose nanofibrils. Amidoximated *DS*: ~1.58.

101



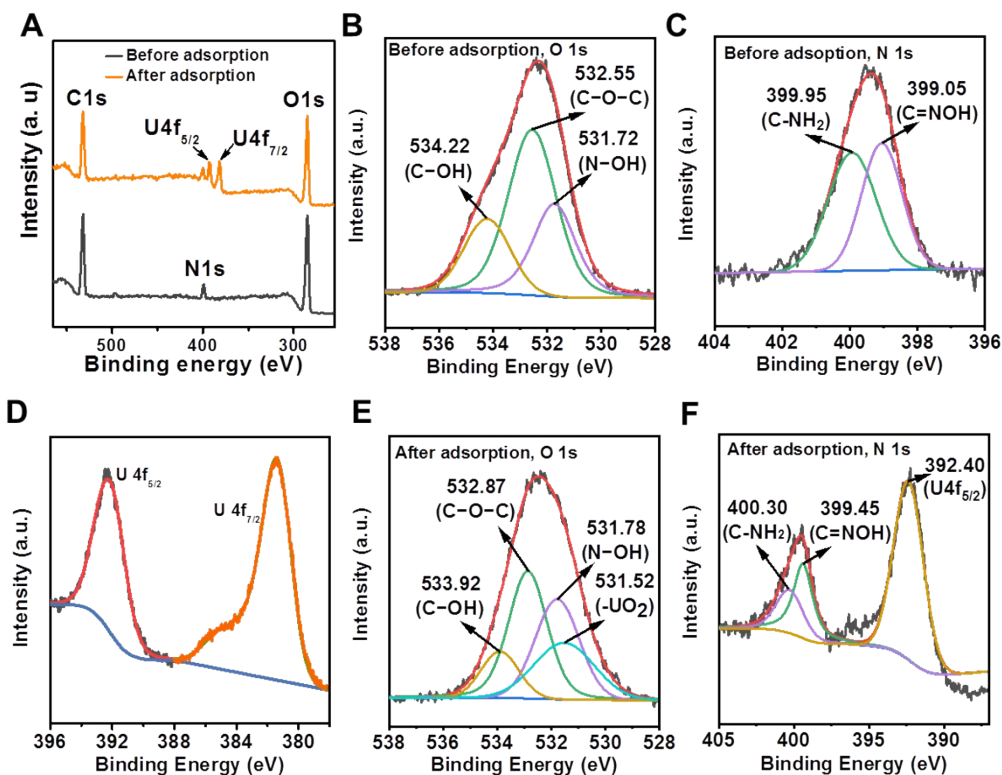

102

103 **Fig. S11.** (A,D) XPS spectra confirmed the uranium adsorption: (A) Wide-range XPS spectra  
 104 of amidoximated cellulose nanofibrils before and after uranium adsorption; (D) High-  
 105 resolution XPS spectra of U4f peaks of amidoximated cellulose nanofibrils after uranium  
 106 adsorption. (B,E) XPS spectra and high-resolution spectra (O1s) of amidoximated cellulose  
 107 nanofibrils before and after uranium adsorption. O1s profiles decomposed into three peaks at  
 108 534.22, 532.55 and 531.72 eV, which are assigned to the C–OH, C–O–C and N–OH. After  
 109 uranium adsorption, the NOH peak shifted to 531.78 eV; and a new peak at 531.55 eV  
 110 (assigned to the O=U=O) was detected, which confirmed the chelation between uranyl ions  
 111 and amidoxime groups. (C,F) XPS spectra and high-resolution spectra (N1s) of  
 112 amidoximated cellulose nanofibrils before and after uranium adsorption. Before uranium  
 113 adsorption, the N1s peak of amidoximated cellulose nanofibrils deconvoluted in two peaks at  
 114 399.95 eV and 399.05 eV, assigned to the nitrogen of C-NH<sub>2</sub> and C=NOH groups<sup>2, 3</sup>. After  
 115 uranium adsorption, three peaks were observed at 400.30 eV assigned for NH<sub>2</sub>, at 399.45 eV  
 116 for NOH and at 392.40 eV for U4f<sub>5/2</sub> due to complexation of U(VI) with oxime.

117

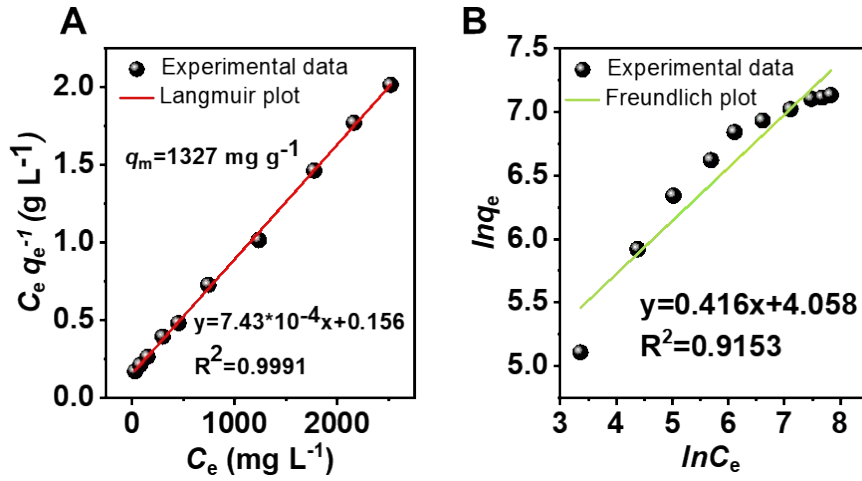

118  
119

120

**Fig. S12.** Linearized Langmuir (A) and Freundlich (B) isothermal models.

121

122

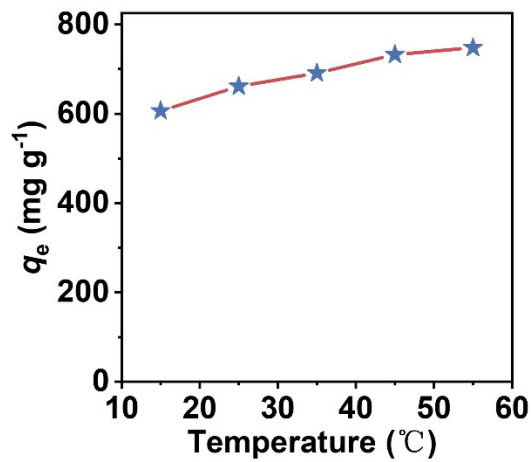

123

124 **Fig. S13.** Influence of temperature on the uranium adsorption performance.  $C_0 = 500 \text{ mg L}^{-1}$ ;

125 pH 8.

126

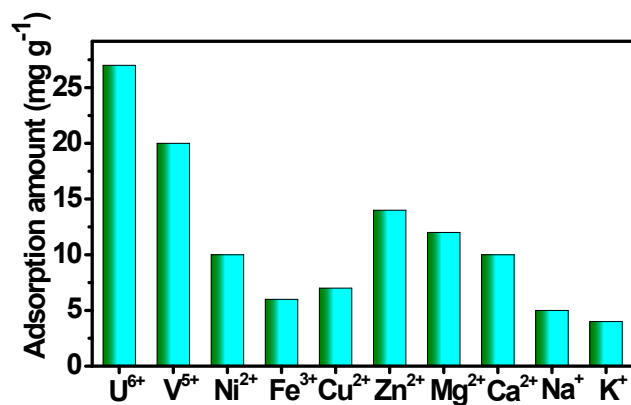

127

128 **Fig. S14.** Selectivity of amidoximated cellulose nanofibrils to indicated element ions in 100×  
 129 their natural concentration in simulated seawater for 24 h.

130

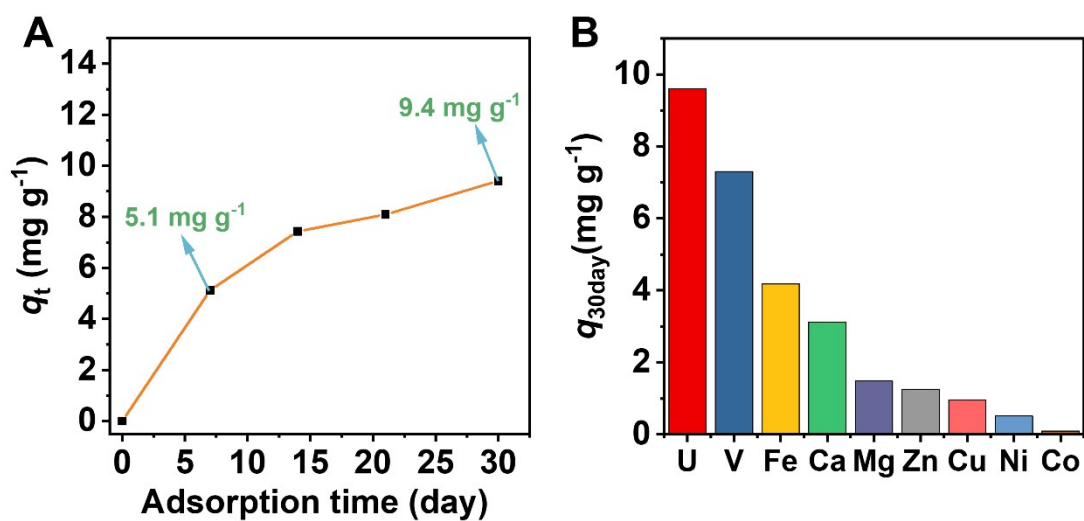

131

132 **Fig. S15.** (A) Uranium adsorption kinetics in natural seawater. (B) Capacities of uranium and  
 133 co-existing ions after adsorption in natural seawater for 30 days.

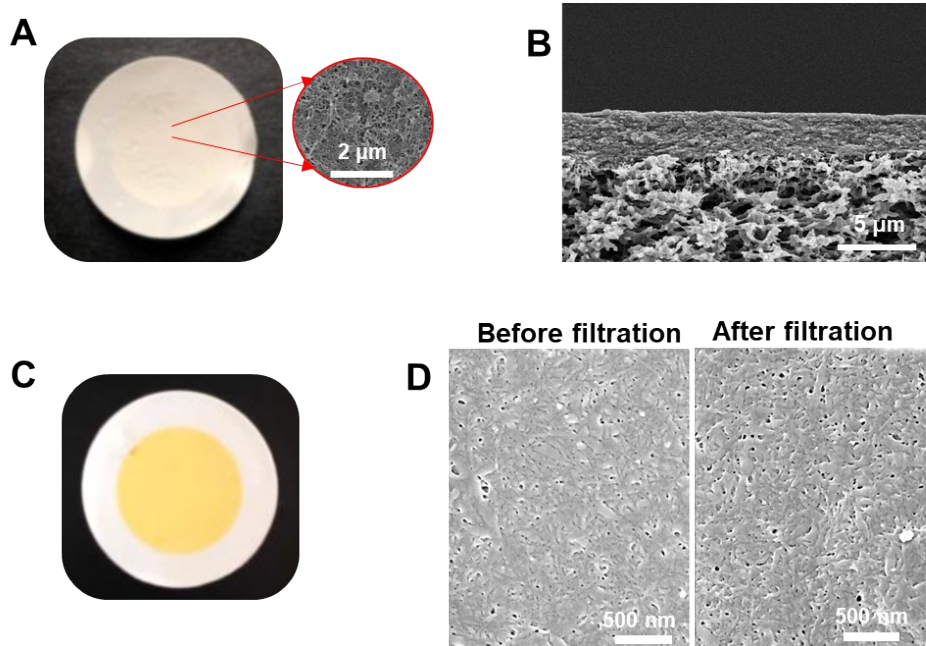

134

135 **Fig. S16.** (A) Photograph and SEM image of surface morphology of amidoximated cellulose  
 136 nanofibril film. (B) Cross-sectional SEM image of amidoximated cellulose nanofibril film. (C)  
 137 Photograph of amidoximated cellulose nanofibril film after uranium filtration. (D) SEM  
 138 images of surface morphology of amidoximated cellulose nanofibril film before and after  
 139 uranium filtration.

140

141 **Supporting tables**

142

143 **Table S1.** Calculation of total energy-consumption and time-consumption for different

144 nanocellulose preparation.

| Treatment of 1 kg raw cellulose pulp                | Total time consumption (h) | Yield (%) | Total energy consumption (KJ) | Energy consumption ( $\text{KJ g}_{\text{Fibril}}^{-1}$ ) | Production speed ( $\text{g}_{\text{Fibril}} \text{h}^{-1}$ ) | Ref.      |
|-----------------------------------------------------|----------------------------|-----------|-------------------------------|-----------------------------------------------------------|---------------------------------------------------------------|-----------|
| TEMPO Oxidation (Homogenization)                    | 36.7                       | 90        | 91152                         | 101.3                                                     | 24.5                                                          | 4         |
| TEMPO Oxidation (sonification)                      | 186.7                      | 70        | 181152                        | 258.8                                                     | 3.7                                                           | 4         |
| Sulfuric acid hydrolysis                            | 18.7                       | 60        | 22435                         | 37.4                                                      | 32.0                                                          | 5         |
| Enzyme hydrolysis                                   | 7.3                        | 69        | 28876                         | 41.8                                                      | 94.5                                                          | 6         |
| Cyanoethylation-induced xfoliation (Homogenization) | 17.3                       | 90        | 45034                         | 31.7                                                      | 82                                                            | This work |
| Cyanoethylation-induced xfoliation (shaking)        | 1.2                        | 58        | 69                            | 0.08                                                      | 700                                                           | This work |

145

146

147

148

149

150 **Table S2.** Degree of substitution (*DS*) of cellulose pulp after different cyanoethylated  
151 reaction time. C, N and H element content were evaluated by Elemental analysis.

| Reaction time (min) | C content (wt%) | N content (wt%) | H content (wt%) | DS   |
|---------------------|-----------------|-----------------|-----------------|------|
| 0                   | 41.95           | 0               | 6.16            | 0    |
| 5                   | 44.09           | 2.30            | 6.76            | 0.29 |
| 15                  | 48.03           | 6.43            | 6.32            | 0.98 |
| 30                  | 52.82           | 9.93            | 6.01            | 1.81 |
| 60                  | 53.69           | 11.27           | 6.01            | 2.26 |
| 120                 | 54.37           | 11.80           | 6.02            | 2.47 |

152

153

154 **Table S3.** Parameters of adsorption isotherm of amidoximated cellulose nanofibrils for U(VI)  
 155 adsorption.

| 156 | Sample                                | Langmuir |       |        | Freundlich |       |        |
|-----|---------------------------------------|----------|-------|--------|------------|-------|--------|
| 157 |                                       | b        | $q_m$ | $R^2$  | $k_f$      | $n_f$ | $R^2$  |
|     | amidoximated cellulose<br>nanofibrils | 0.006    | 1327  | 0.9981 | 188.93     | 4.03  | 0.9261 |

158 **Table S4.** Comparison of amidoximated cellulose nanofibrils for U(VI) adsorption with  
 159 various adsorbents.

| Adsorbents                                                                       | Time (min) | Adsorption capacity in simulated water (mg g <sup>-1</sup> ) | Adsorption capacity in natural seawater (mg g <sup>-1</sup> ) | pH | Reference |
|----------------------------------------------------------------------------------|------------|--------------------------------------------------------------|---------------------------------------------------------------|----|-----------|
| SiO <sub>2</sub> -AO <sup>a</sup>                                                | 10         | 955.8                                                        | /                                                             | 8  | 7         |
| UiO-66 <sup>b</sup>                                                              | 720        | 346.89                                                       | 4.62                                                          | 6  | 8         |
| AO-COF <sup>c</sup>                                                              | 30         | 408                                                          | /                                                             | 6  | 9         |
| AO-HNTs <sup>d</sup>                                                             | 1200       | 453.6                                                        | 9.01                                                          | 7  | 10        |
| [NH <sub>4</sub> ] <sup>+</sup> [COF-SO <sub>3</sub> <sup>-</sup> ] <sup>e</sup> | 210        | 851                                                          | /                                                             | 5  | 11        |
| DSHM-DAMN <sup>f</sup>                                                           | 75         | 601                                                          | /                                                             | 8  | 12        |
| AO-Fe <sub>3</sub> O <sub>4</sub> @SiO <sub>2</sub> <sup>g</sup>                 | 240        | 105                                                          | /                                                             | 5  | 13        |
| NDA-TN-AO <sup>h</sup>                                                           | 900        | 589.1                                                        | 6.07                                                          | 5  | 14        |
| COF-PDAN-AO <sup>i</sup>                                                         | 25         | 410                                                          | -                                                             | 4  | 15        |
| COF-HHTF-AO <sup>j</sup>                                                         | 30         | 550.1                                                        | 5.12                                                          | 7  | 16        |
| BD-TN-AO <sup>k</sup>                                                            | 900        | 562                                                          | 5.68                                                          | 5  | 17        |
| Bd-DBD <sup>l</sup>                                                              | 300        | 1006.5                                                       | 7.29                                                          | 6  | 18        |
| POP-PO <sub>3</sub> H <sub>2</sub> <sup>m</sup>                                  | 20         | 501                                                          | 5.01                                                          | 5  | 19        |
| In-situ polymerized LDH <sup>n</sup>                                             | 400        | 1456                                                         | /                                                             | 7  | 20        |
| MF-HTC <sup>o</sup>                                                              | 60         | 2208                                                         | /                                                             | 3  | 21        |
| PHO-CNF <sup>p</sup>                                                             | 60         | 1550                                                         | /                                                             | 6  | 22        |
| SMON-PAO <sup>q</sup>                                                            | 1800       | 1650                                                         | 9.59                                                          | 8  | 23        |
| Amidoximated cellulose nanofibrils                                               | 3.5        | 1327                                                         | 9.4                                                           | 8  | This work |
| Silk-nanofibrils                                                                 | 5          | 14.5                                                         | /                                                             | 8  | This work |
| Chitin-nanofibrils                                                               | 6          | 25.6                                                         | /                                                             | 8  | This work |
| Tempo-cellulose nanofibrils                                                      | 3          | 181.6                                                        | /                                                             | 8  | This work |
| Lysozyme-nanofibrils                                                             | 8          | 30.1                                                         | /                                                             | 8  | This work |

160 <sup>a</sup>Amidoxime functionalized silica framework (SiO<sub>2</sub>-AO); <sup>b</sup>Antibacterial UiO-66 metal-  
 161 organic frameworks (Anti-UiO-66); <sup>c</sup>Amidoxime-functionalized covalent organic  
 162 frameworks (AO-COF); <sup>d</sup>Amidoxime-functionalized halloysite nanotubes adsorbents (AO-  
 163 HNTs); <sup>e</sup>Ammoniating SO<sub>3</sub>H-decorated covalent organic framework ([NH<sub>4</sub>]<sup>+</sup>[COF-SO<sub>3</sub><sup>-</sup>]);  
 164 <sup>f</sup>Diaminomaleonitrile (DAMN) functionalized double-shelled hollow (DSHM) metal-organic  
 165 framework (DSHM-DAMN); <sup>g</sup>Amidoxime modified Fe<sub>3</sub>O<sub>4</sub>@SiO<sub>2</sub> (AO-Fe<sub>3</sub>O<sub>4</sub>@SiO<sub>2</sub>);



166 <sup>h</sup>Naphthalene-based sp<sup>2</sup>-carbon amidoxime-functionalized covalent organic frameworks  
167 (NDA-TN-AO); <sup>i</sup>Carbon-conjugated amidoxime-functionalized covalent organic frameworks  
168 (COF-PDAN-AO); <sup>j</sup>Amidoxime functionalized two-dimensional (2D) polyarylether-based  
169 covalent organic frameworks (COF-HHTF-AO); <sup>k</sup>Amidoxime crystalline covalent organic  
170 framework (BD-TN-AO); <sup>l</sup>Benzoxazole-based covalent organic frameworks(Bd-DBD);  
171 <sup>m</sup>Porous organic polymer-PO<sub>3</sub>H<sub>2</sub> (POP-PO<sub>3</sub>H<sub>2</sub>); <sup>n</sup>Polymer intercalated hybrid layered double  
172 hydroxide (LDH); <sup>o</sup>Magnesium ferrite loaded hydrothermal carbon (MF-HTC);  
173 <sup>p</sup>Phosphorylated cellulose nanofibers (PHO-CNF); <sup>q</sup>Porous amidoxime-based nanofiber  
174 adsorbent (SMON-PAO).

175

## 176 Supporting references

- 177 1. Q. Xia, C. Chen, Y. Yao, J. Li, S. He, Y. Zhou, T. Li, X. Pan, Y. Yao and L. Hu, *Nat.*  
178 *Sustain.*, 2021, **4**, 627-635.
- 179 2. J. Wu, K. Tian and J. Wang, *Prog. Nucl. Energ.*, 2018, **106**, 79-86.
- 180 3. X. L. Wang, Y. Li, J. Huang, Y. Z. Zhou, B. L. Li and D. B. Liu, *J. Environ.*  
181 *Radioactiv.*, 2019, **197**, 81-89.
- 182 4. Q. Li, S. McGinnis, C. Sydnor, A. Wong and S. Renneckar, *ACS Sustain. Chem. Eng.*,  
183 2013, **1**, 919-928.
- 184 5. S. Beck-Candanedo, M. Roman and D. G. Gray, *Biomacromolecules*, 2005, **6**, 1048-  
185 1054.
- 186 6. M. Paako, M. Ankerfors, H. Kosonen, A. Nykanen, S. Ahola, M. Osterberg, J.  
187 Ruokolainen, J. Laine, P. T. Larsson and O. Ikkala, *Biomacromolecules*, 2007, **8**,  
188 1934-1941.
- 189 7. M. Ahmad, J. Wang, Z. Yang, Q. Zhang and B. Zhang, *Chem. Eng. J.*, 2020, **389**,  
190 124441.
- 191 8. Q. Yu, Y. Yuan, J. Wen, X. Zhao, S. Zhao, D. Wang, C. Li, X. Wang and N. Wang,  
192 *Adv. Sci.*, 2019, **6**, 1900002.
- 193 9. Q. Sun, B. Aguila, L. D. Earl, C. W. Abney, L. Wojtas, P. K. Thallapally and S. Ma,  
194 *Adv. Mater.*, 2018, **30**, 1705479.
- 195 10. S. Zhao, Y. Yuan, Q. Yu, B. Niu, J. Liao, Z. Guo and N. Wang, *Angew. Chem. Int.*  
196 *Edit.*, 2019, **131**, 15121-15127.
- 197 11. X. H. Xiong, Z. W. Yu, L. L. Gong, Y. Tao, Z. Gao, L. Wang, W. H. Yin, L. X. Yang  
198 and F. Luo, *Adv. Sci.*, 2019, **6**, 1900547.
- 199 12. J. Zhang, H. Zhang, Q. Liu, D. Song, R. Li, P. Liu and J. Wang, *Chem. Eng. J.*, 2019,  
200 **368**, 951-958.
- 201 13. Y. Zhao, J. Li, L. Zhao, S. Zhang, Y. Huang, X. Wu and X. Wang, *Chem. Eng. J.*,  
202 2014, **235**, 275-283.
- 203 14. W. R. Cui, F. F. Li, R. H. Xu, C. R. Zhang, X. R. Chen, R. H. Yan, R. P. Liang and J.  
204 D. Qiu, *Angew. Chem. Int. Edit.*, 2020, **132**, 17837-17843.
- 205 15. F.-F. Li, W.-R. Cui, W. Jiang, C.-R. Zhang, R.-P. Liang and J.-D. Qiu, *J. Hazard.*  
206 *Mater.*, 2020, **392**, 122333.
- 207 16. G. Cheng, A. Zhang, Z. Zhao, Z. Chai, B. Hu, B. Han, Y. Ai and X. Wang, *Sci. Bull.*,  
208 2021, **66**, 1994-2001.
- 209 17. C.-R. Zhang, W.-R. Cui, R.-H. Xu, X.-R. Chen, W. Jiang, Y.-D. Wu, R.-H. Yan, R.-P.  
210 Liang and J.-D. Qiu, *CCS Chem.*, 2021, **3**, 168-179.
- 211 18. W. R. Cui, C. R. Zhang, R. H. Xu, X. R. Chen, R. H. Yan, W. Jiang, R. P. Liang and J.  
212 D. Qiu, *Small*, 2021, **17**, 2006882.
- 213 19. Q. Sun, Y. Song, B. Aguila, A. S. Ivanov, V. S. Bryantsev and S. Ma, *Adv. Sci.*, 2021,  
214 **8**, 2001573.
- 215 20. A. Jana, A. Unni, S. S. Ravuru, A. Das, D. Das, S. Biswas, H. Sheshadri and S. De,  
216 *Chem. Eng. J.*, 2022, **428**, 131180.
- 217 21. X. Li, Y. Li, Q. Wu, M. Zhang, X. Guo, X. Li, L. Ma and S. Li, *Chem. Eng. J.*, 2019,  
218 **365**, 70-79.
- 219 22. J. Lehtonen, J. Hassinen, A. A. Kumar, L.-S. Johansson, R. Mäenpää, N. Pahimanolis,

- 220 T. Pradeep, O. Ikkala and O. J. Rojas, *Cellulose*, 2020, **27**, 10719-10732.  
221 23. Y. Yuan, S. Zhao, J. Wen, D. Wang, X. Guo, L. Xu, X. Wang and N. Wang, *Adv.*  
222 *Funct. Mater.*, 2019, **29**, 1805380.
